# Supplementary material for: Researcher's Perceptions on Publishing “Negative” Results and Open Access
Source: PubMed Central journal article supplement — Nucleic Acid Ther. 2021 Jun 4;31(3):185–9. doi: 10.1089/nat.2020.0865 (PMC8215407; doi:10.1089/nat.2020.0865), 2021-06-04
Supplement: Supp_Data.pdf [file Supp_Data.pdf]

## Supplementary Data

### Open Access and Negative Results Survey

\* Required

#### 1. Career Stage \*

*Mark only one oval.*

- Degree
- student Master
- student
- PhD student
- Early Career Researcher (less than 8 years after PhD date) Experienced Researcher

#### 2. Where do you work? \*

*Mark only one oval.*

- Austria
- Belgium
- Bosnia Herzegovina
- Canada China
- Croatia
- Cyprus
- Czech Republic
- Denmark
- Estonia
- Finland
- France
- Germany
- Greece
- Hungary
- Ireland
- Israel
- Italy
- Latvia
- Malta
- Netherlands
- Norway
- Poland
- Portugal
- Romania
- Serbia
- Slovenia
- Spain
- Sweden
- Turkey
- United Kingdom
- United States
- Another

#### 3. Research Field \*

*Mark only one oval.*

- Clinical Medicine
- Biology
- Biomedicine
- Chemistry
- Engineering
- Other:

#### 4. Do you decide where to publish your research? \*

*Mark only one oval.*

- Yes. I am often senior author and decide where to send it
- Most times. I am often last or first author and discuss it with my co-authors
- No, my supervisor/Principal Investigator decides

#### 5. How often do you typically publish? \*

*Mark only one oval.*

- Less than one paper/year
- 1-2 papers/year
- 3-5 papers/year
- More than 5 papers/year

#### 6. What appeals to you most when choosing a journal? (click all that apply) \*

*Check all that apply.*

- Impact factor
- Popularity/readership in my particular field
- Ease of Publishing
- No/Low Cost
- Quality Feedback
- Turnaround Time

#### 7. Have you ever published in an open access (OA) journal? \*

*Mark only one oval.*

- Yes
- No

#### 8. Why do you publish in OA journals? Check all that apply \*

*Check all that apply.*

- My chosen journal happened to be Open Access
- I wanted my research to be Open Access
- My funding body mandates I should publish Open Access
- I was not aware the journal was Open Access until I was requested to pay APC charges
- I had specific funding to publish OA
- I have never published in Open Access journals

#### 9. What are your main reasons NOT TO publish OA? \*

*Check all that apply.*

- APC charges are too expensive
- The journals of my field do not have OA option
- Traditional journals have better IF than OA journals
- Not applicable, I like to publish OA when possible

#### 10. Have you ever published your paper in your webpage or uploaded it to an institutional repository? \*

*Mark only one oval.*

- Yes, an institutional repository
- Yes, my own web
- Yes, on my web and an institutional repository
- Yes, on my researchgate/LinkedIn profile
- All of the above
- No

11. Do you think that finding a different result from what is already published is a negative thing? \*
- Mark only one oval.*
- Yes  
 No  
 Maybe
12. Have you ever published “negative” results? \*
- Mark only one oval.*
- Yes  
 No
13. If yes, where have you published them? (Indicate Journal Name)
14. Have you ever tried unsuccessfully to publish negative results? \*
- Mark only one oval.*
- Yes  
 No
15. If you have tried unsuccessfully to publish negative results, when did this happen? \*
- Mark only one oval.*
- Not applicable  
 I tried unsuccessfully <2 years ago  
 I tried unsuccessfully 2-5 years ago  
 I tried unsuccessfully >5 years ago
16. Would you like to publish your negative results? \*
- Mark only one oval.*
- Yes  
 No  
 Maybe
17. Why would you NOT publish negative results? (tick all that apply) \*
- Check all that apply.*
- I am embarrassed, I wanted this to work  
 It is too expensive  
 It is too time consuming  
 Negative results are cited less than positive results  
 My co-authors do not agree  
 I collaborate with industries and they do not allow me to publish negative results  
 I need good publications to keep my job  
 other:  \_\_\_\_\_
18. Where would you publish negative results? \*
- Mark only one oval.*
- The usual journals  
 I would upload a manuscript to a repository / webpage (no peer reviewed)  
 A specific negative results journal  
 I don't know
19. If you published negative results was this:\*
- Mark only one oval.*
- as difficult as  
 usual more difficult than  
 usual easier than usual  
 I did not published negative results
20. Do you think negative results are worth sharing with the scientific community? \*
- Mark only one oval.*
- Yes  
 No  
 Maybe
21. How would you make negative results more attractive for publication? \*
- \_\_\_\_\_
22. Would you be willing to add your negative results to those of another group (on a similar topic) to increase the attractiveness of the publication? \*
- Mark only one oval.*
- Yes  
 No  
 Maybe
23. Are you a member of COST Action 17103 (DARTER-Delivery of antisense RNA Therapeutics)? \*
- Mark only one oval.*
- Yes  
 No  
 For DARTER Members
24. Which is your research domain/interest/expertise? \*
- Check all that apply.*
- A particular disease I want to apply antisense molecules to  
 Chemistry and design of antisense molecules  
 Delivery/Efficacy of antisense molecules  
 Safety / TK of antisense molecules
25. Which model system are you working with? \*
- Check all that apply.*
- Human  
 Mouse  
 Pig  
 Fly  
 Cell culture  
 Organoids/IPSC  
 Non-human primates  
 other:  \_\_\_\_\_
26. Which disease/disorder are you interested in? \*
- Check all that apply.*
- Cancer  
 Neuromuscular disorders  
 Cardiomyopathies  
 Neurological and neurodegenerative diseases  
 Lysosomal storage disorders  
 Liver pathology  
 Inflammatory and immunological disorders  
 Infectious diseases  
 Ocular diseases  
 Metabolic diseases  
 Skin diseases  
 No specific disease  
 other:  \_\_\_\_\_
27. Are you interested in joining a group of negative results within our COST Action? (If you are, please email the Action's Chair) \*
- Mark only one oval.*
- Yes  
 No  
 Maybe
